# Supplementary material for: Glomus Tumors: A Systematic Review of the Sub-Saharan Africa Experience
Source: PubMed Central journal article supplement — Plast Reconstr Surg Glob Open. 2024 Feb 1;12(2):e5564. doi: 10.1097/GOX.0000000000005564 (PMC10833630; doi:10.1097/gox.0000000000005564), 2024-02-01
Supplement: gox-12-e5564-s001.pdf [file gox-12-e5564-s001.pdf]

Example of search terms used in databases:

EMBASE

('glomus tumor'/exp OR 'glomus tumor' OR (('glomus'/exp OR glomus) AND ('tumor'/exp OR tumor)) OR 'glomangioma'/exp OR glomangioma OR 'glomangiomyoma'/exp OR glomangiomyoma) AND ('africa'/exp OR africa)
